# Supplementary material
Source: PubMed Central journal article supplement (PMC6235688)
Supplement: djy040_supp.pdf [file djy040_supp.pdf]

**Supplementary Table 1. Main Effects of Metformin and Weight Loss on Breast-Cancer Related Biomarkers Among Breast Cancer Survivors in a 2x2 Factorial Randomized Controlled Trial, Stratified by Intervention Adherence\***

|                                       | 6-Month Change Between & Placebo and Metformin Groups |                         |          | 6-Month Change Between Control and Weight Loss Groups |          |
|---------------------------------------|-------------------------------------------------------|-------------------------|----------|-------------------------------------------------------|----------|
|                                       | n                                                     | Percent Change (95% CI) | p-value† | Percent Change (95% CI)                               | p-value† |
| <b>Insulin</b>                        |                                                       |                         |          |                                                       |          |
| ≥ 5% Weight loss                      | 118                                                   | 3.8% (-7.3%, 14.8%)     | 0.51     | -7.6% (-19.1%, 3.9%)                                  | 0.19     |
| <5% Weight loss                       | 215                                                   | -10.4% (-19.3%, -1.4%)  | 0.02     | -8.4% (-17.5%, 0.6%)                                  | 0.07     |
| ≥ 80% Pill adherence                  | 245                                                   | -10.2% (-18.3%, -2.0%)  | 0.02     | -12.8% (-20.9%, -4.6%)                                | <0.001   |
| <80% Pill adherence                   | 88                                                    | -1.5% (-17.1%, 14.2%)   | 0.86     | -10.6% (-25.3%, 4.0%)                                 | 0.16     |
| <b>Glucose</b>                        |                                                       |                         |          |                                                       |          |
| ≥ 5% Weight loss                      | 118                                                   | 1.9% (-1.2%, 5.1%)      | 0.24     | -2.1% (-5.4%, 1.1%)                                   | 0.20     |
| <5% Weight loss                       | 215                                                   | -2.6% (-5.5%, 0.2%)     | 0.08     | -1.1% (-4.0%, 1.8%)                                   | 0.46     |
| ≥ 80% Pill adherence                  | 245                                                   | -1.4% (-3.9%, 1.1%)     | 0.29     | -2.4% (-4.9%, 0.1%)                                   | 0.06     |
| <80% Pill adherence                   | 88                                                    | -0.8% (-4.9%, 3.2%)     | 0.69     | -0.5% (-4.3%, 3.4%)                                   | 0.81     |
| <b>C-Reactive protein</b>             |                                                       |                         |          |                                                       |          |
| ≥ 5% Weight loss                      | 118                                                   | -9.2% (-38.2%, 19.7%)   | 0.53     | -13.7% (-43.5%, 16.2%)                                | 0.36     |
| <5% Weight loss                       | 213                                                   | -15.3% (-39.2%, 8.7%)   | 0.22     | -7.6% (-31.7%, 16.6%)                                 | 0.54     |
| ≥ 80% Pill adherence                  | 244                                                   | -20.7% (-42.2%, 0.8%)   | 0.06     | -13.4% (-34.9%, 8.1%)                                 | 0.22     |
| <80% Pill adherence                   | 87                                                    | 7.1% (-24.5%, 38.6%)    | 0.67     | -8.0% (-37.8%, 21.9%)                                 | 0.61     |
| <b>Bioavailable estradiol</b>         |                                                       |                         |          |                                                       |          |
| ≥ 5% Weight loss                      | 118                                                   | -8.5% (-20.8%, 3.8%)    | 0.17     | -3.9% (-16.3%, 8.5%)                                  | 0.53     |
| <5% Weight loss                       | 215                                                   | -3.8% (-15.3%, 7.7%)    | 0.52     | 2.1% (-9.5%, 13.8%)                                   | 0.72     |
| ≥ 80% Pill adherence                  | 245                                                   | -15.5% (-23.6%, -7.4%)  | 0.01     | -6.7% (-14.8%, 1.4%)                                  | 0.11     |
| <80% Pill adherence                   | 88                                                    | 1.3% (-26.9%, 29.6%)    | 0.93     | 0.3% (-26.6%, 27.1%)                                  | 0.98     |
| <b>Bioavailable testosterone</b>      |                                                       |                         |          |                                                       |          |
| ≥ 5% Weight loss                      | 118                                                   | -9.7% (-18.7%, -0.7%)   | 0.03     | -2.6% (-11.6%, 6.4%)                                  | 0.57     |
| <5% Weight loss                       | 215                                                   | -5.6% (-13.1%, 1.9%)    | 0.15     | 1.7% (-5.9%, 9.3%)                                    | 0.66     |
| ≥ 80% Pill adherence                  | 245                                                   | -10.1% (-15.9%, -4.4%)  | 0.002    | -3.6% (-9.4%, 2.1%)                                   | 0.22     |
| <80% Pill adherence                   | 88                                                    | -13.3% (-32.0%, 5.3%)   | 0.15     | 3.3% (-13.9%, 20.6%)                                  | 0.70     |
| <b>Serum hormone binding globulin</b> |                                                       |                         |          |                                                       |          |
| ≥ 5% Weight loss                      | 118                                                   | 3.5% (-6.3%, 13.3%)     | 0.48     | 3.9% (-6.1%, 13.8%)                                   | 0.45     |
| <5% Weight loss                       | 215                                                   | 4.1% (-1.2%, 9.4%)      | 0.13     | -0.8% (-6.1%, 4.5%)                                   | 0.76     |
| ≥ 80% Pill adherence                  | 245                                                   | 9.9% (3.9%, 15.9%)      | 0.004    | 6.7% (0.7%, 12.7%)                                    | 0.03     |
| <80% Pill adherence                   | 88                                                    | 3.9% (-5.8%, 13.7%)     | 0.43     | -0.4% (-9.6%, 8.8%)                                   | 0.93     |

\*There was no evidence that degree of adherence affected biomarker changes based on a 2-sided t-statistic for 3-way interactions of adherence\*treatment\*time in a mixed model analysis.

† Test of biomarkers changes within strata based on a 2-sided t-statistic for the group\*time interaction in a mixed model analysis.
